# Supplementary material
Source: publisher figshare collection journal article supplement (https://sage.figshare.com/ndownloader/files/18716174)
Supplement: Supplementary file 1 [file 18716174]

Supplement materials

**Basic Vignette**

During the summer of 2014, an attack was reported at a police station in central Israel. According to the report, during a fight that started between two young men, one of them was injured and taken to the hospital in critical condition with injuries to his upper body. The witnesses reported that the incident took place in a shopping mall parking lot. The incident started with an argument concerning a parking space. Following a few verbal exchanges, the young Arab (Jewish) man was stabbed by the young Jewish (Arab/ African) man. Following the attack, the suspect fled the scene. The report was received at the police station about 15 minutes after the end of the incident. Policemen were sent to the scene and began an investigation.

## ATTRIBUTION OF BLAME TOWARD OFFENDERS

Supplementary materials

Table 1S.

*Pairwise comparisons by observer ethnic and religious background regarding three way interaction in offender blaming*

| <i><b>Observer background</b></i> | <i><b>Offender ethnicity</b></i> | <i><b>F</b></i> | <i><b><math>\eta^2</math></b></i> | <i><b>df</b></i> |
|-----------------------------------|----------------------------------|-----------------|-----------------------------------|------------------|
| <b>Christian Arabs</b>            | African offender                 | 1.18            | .00                               | 1, 569           |
|                                   | Arab offender                    | 0.08            | .00                               | 1, 569           |
|                                   | Jewish offender                  | 11.88**         | .02                               | 1, 569           |
| <b>Muslim Arabs</b>               | African offender                 | 2.58            | .01                               | 1, 569           |
|                                   | Arab offender                    | 0.40            | .00                               | 1, 569           |
|                                   | Jewish offender                  | 0.01            | .00                               | 1, 569           |
| <b>Jewish</b>                     | African offender                 | 0.81            | .00                               | 1, 569           |
|                                   | Arab offender                    | 2.25            | .00                               | 1, 569           |
|                                   | Jewish offender                  | 6.94**          | .01                               | 1, 569           |
